# Supplementary material for: Retracted Article: Long noncoding RNA ANRIL protects cardiomyocytes against hypoxia/reoxygenation injury by sponging miR-195-5p and upregulating Bcl-2
Source: Royal Society of Chemistry journal article supplement (doi:10.1039/c9ra04898g), 2019-01-01

Supplement Figure 1. The basic marker cardiac troponin-I (cTNI) of AC16 cells.

AC16 cells versus H9C2 cardiomyoblast cells.

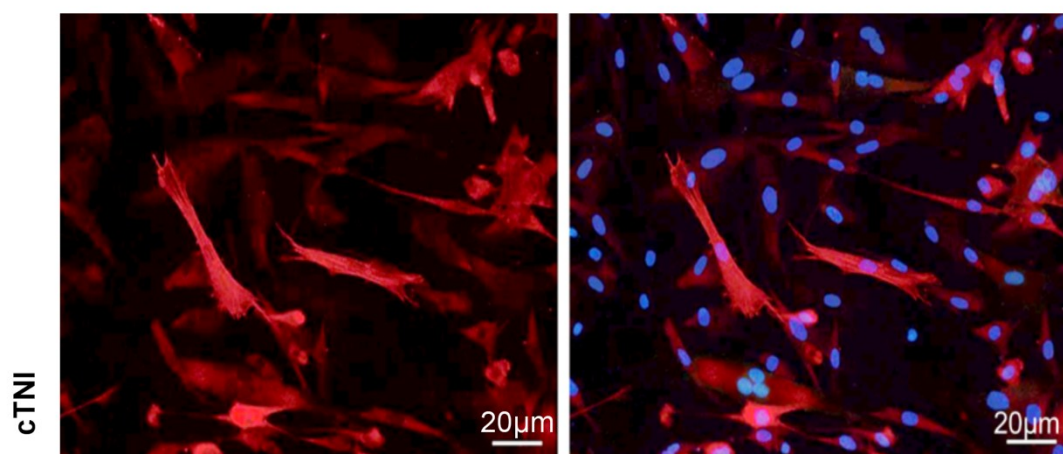

Supplement Figure 2. The maps of the pcDNA3.1(+) vector and pmirGLO vector.

**A**

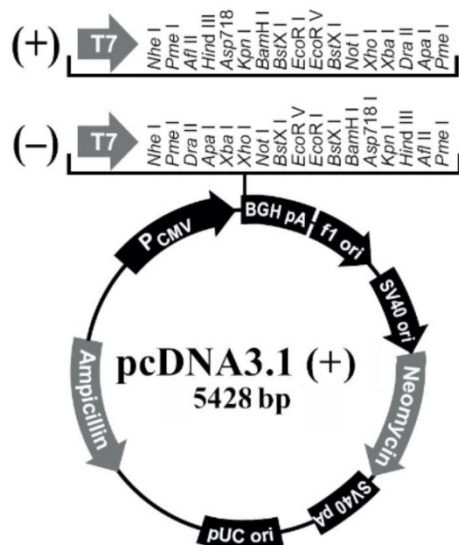

**B**

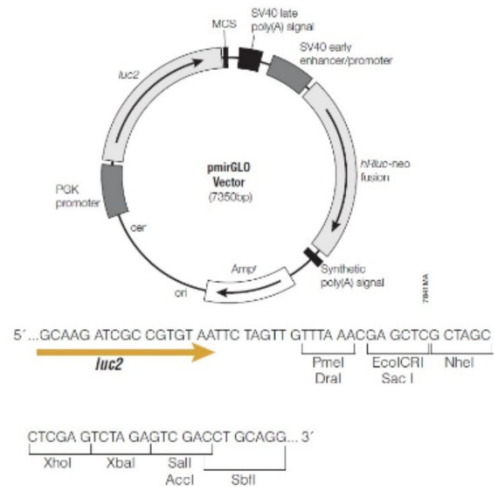

Supplement Figure 3. The transfection efficiency of the pcDNA3.1(+) vector and control siRNA using fluorescence microscopy. pcDNA3.1(+) vector and control siRNA were labeled with GFP and Cy3 fluorescence proteins, respectively, followed by the observation of transfection efficiency using the Olympus IX81 invert fluorescence microscopy.

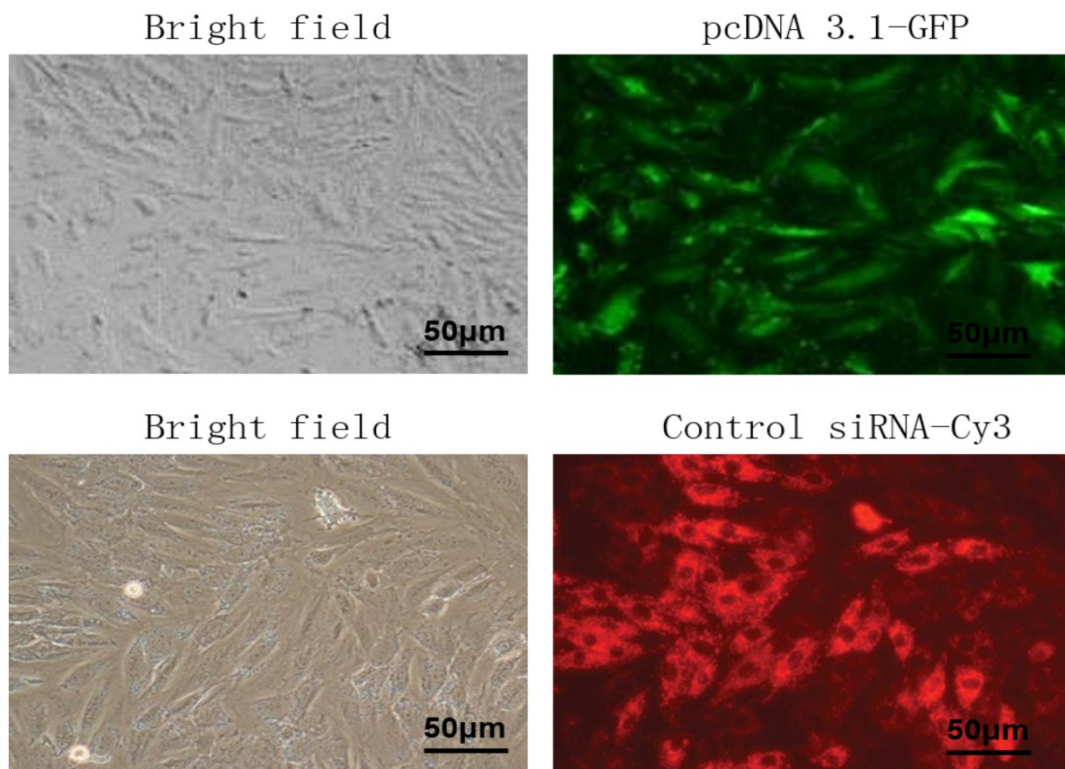

Supplement: c9ra04898g1.pdf [file c9ra04898g1.pdf]
